# Supplementary material for: Hydraulic characteristics of integrated settler based biofilm reactor as onsite sanitation system
Source: publisher site journal article supplement (doi:10.1515/ijcre-2021-0112), 2021-08-18
Supplement: Supplementary file 1 [file j_ijcre-2021-0112_suppl.doc]

**RESEARCH HIGHLIGHTS**

- Supporting media enhances the hydraulic characteristics and treatment efficiency.
- Developed system demonstrated high hydraulic as well as treatment efficiency.
- Capability to withstand high hydraulic shock load at variable peak flow factors.
- Simple configuration suitable for onsite treatment of domestic wastewater.
